# Supplementary material for: Conjugation of Therapeutic PSD-95 Inhibitors to the Cell-Penetrating Peptide Tat Affects Blood–Brain Barrier Adherence, Uptake, and Permeation
Source: PubMed Central journal article supplement (PMC7408072; doi:10.3390/pharmaceutics12070661), 2020-07-14
Supplement: pharmaceutics-12-00661-s001.pdf [file pharmaceutics-12-00661-s001.pdf]

# Supplementary Materials: Conjugation of Therapeutic PSD-95 Inhibitors to the Cell-Penetrating Peptide Tat Affects Blood-Brain Barrier Adherence, Uptake, and Permeation

Mie Kristensen, Krzysztof Kucharz, Eduardo Felipe Alves Fernandes, Kristian Strømgaard, Morten Schallburg Nielsen, Hans Christian Cederberg Helms, Anders Bach, Malte Ulrikkaholm Tofte-Hansen, Blanca Irene Aldana Garcia, Martin Lauritzen and Birger Brodin

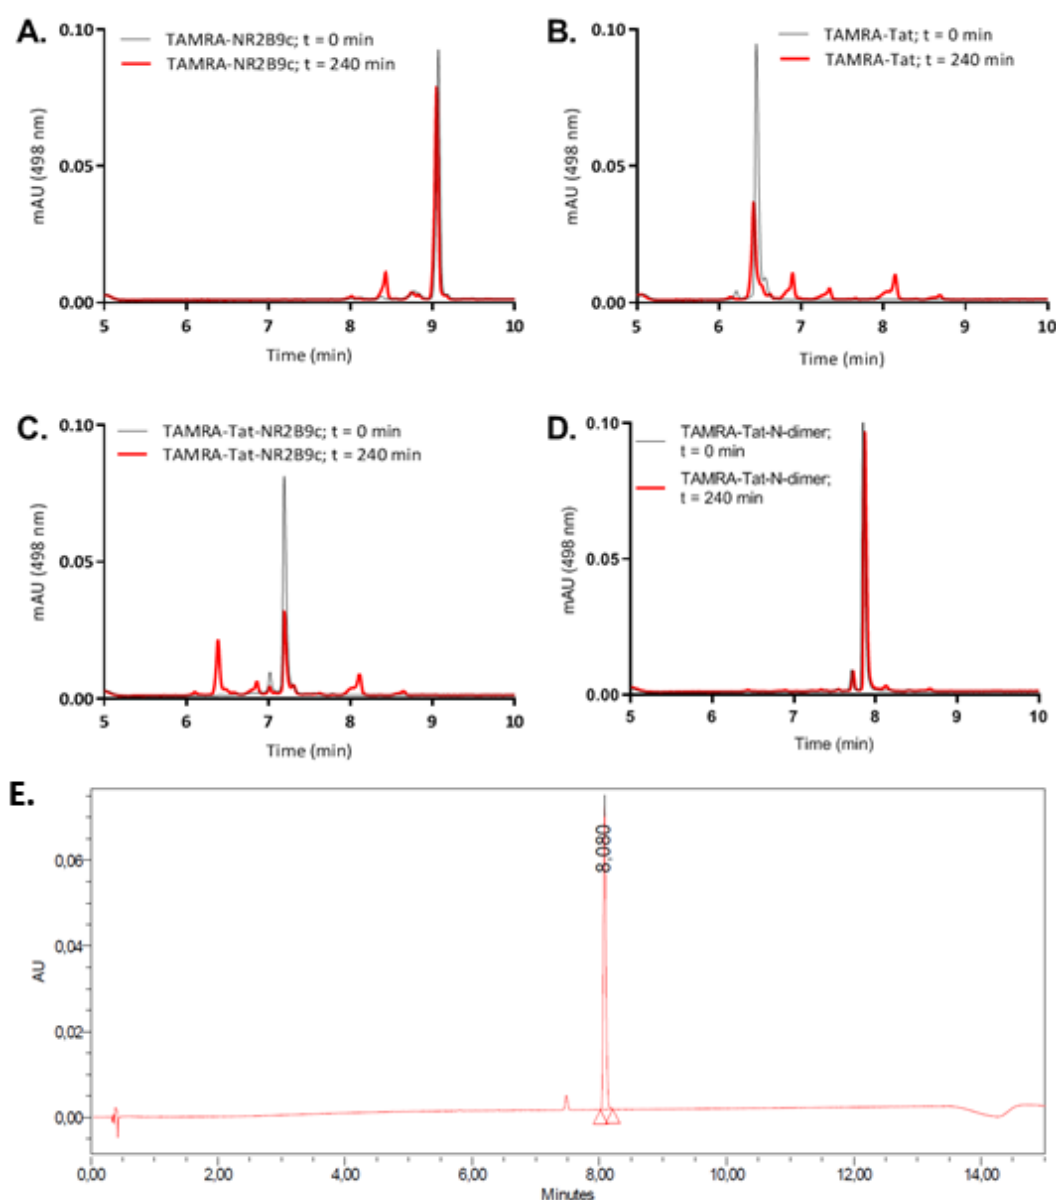

**Figure S1.** (A–D) Degradation profiles illustrated as chromatograms obtained at 498 nm (TAMRA detection) from UPLC analysis of TAMRA-NR2B9c, TAMRA-Tat, TAMRA-Tat-NR2B9c, and TAMRA-Tat-N-dimer before and after 4 h incubation in 37 °C media supplemented with 10% FBS. (E) UPLC chromatogram obtained at 498 nm of TAMRA as single entity.

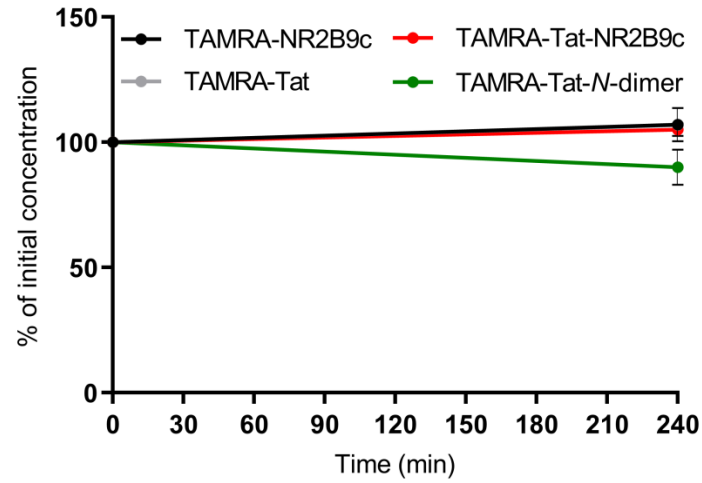

**Figure S2.** Remaining peptide after 4 h incubation in 37 °C PBS. Data are presented  $\pm$  SD (N = 2).

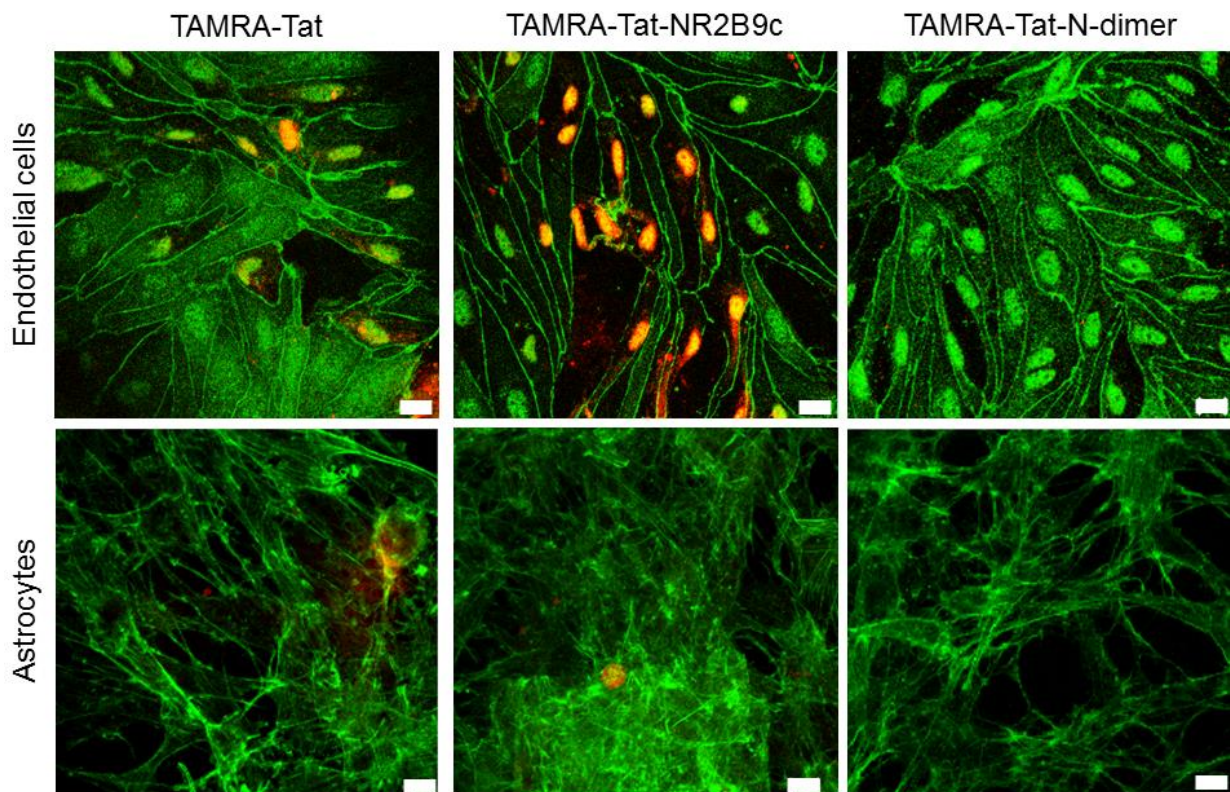

**Figure S3.** 100  $\mu$ M TAMRA-Tat, TAMRA-Tat-NR2B9c, or TAMRA-Tat-N-dimer was applied to the *in vitro* bovine blood-brain barrier model for 15 min. Following cell fixation, peptide uptake into the endothelial cells and the astrocytes was inspected via TAMRA-fluorescence using confocal microscopy with co-staining of ZO-1 and  $\beta$ -actin, respectively. Z-stacks, scale bar: 10  $\mu$ m.

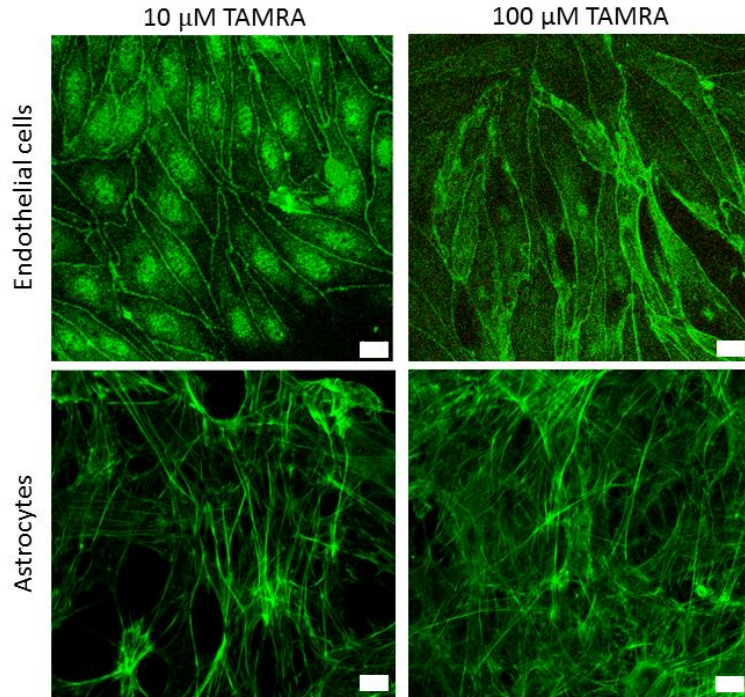

**Figure S4.** 10 μM or 100 μM TAMRA was applied to the *in vitro* bovine blood-brain barrier model for 3 h. Following cell fixation, potential TAMRA uptake into the endothelial cells and the astrocytes was inspected using confocal microscopy with co-staining of ZO-1 and β-actin, respectively. Z-stacks, scale bar: 10 μm.

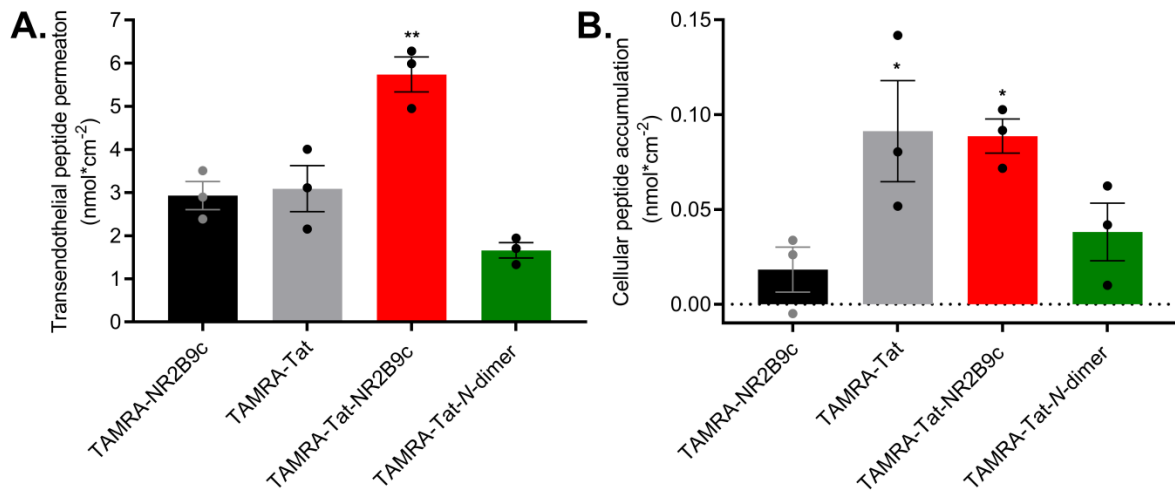

**Figure S5.** 100 μM TAMRA-NR2B9c, TAMRA-Tat, TAMRA-Tat-NR2B9c, or TAMRA-Tat-N-dimer was applied to an *in vitro* blood-brain barrier model composed of primary mouse endothelial cells in co-culture with primary rat astrocytes for 3 h. (A) Total peptide being transported across the barrier was quantified. (B) After the permeation study, the cells were washed with HBSS prior quantification of peptide accumulating in the cell fraction. Data are presented as mean ± SEM (N = 3, n = 3) Levels of significance are \*: p < 0.05 and \*\*: p < 0.01 when compared to TAMRA-NR2B9c (one-way ANOVA with Dunnett's multiple comparisons test).

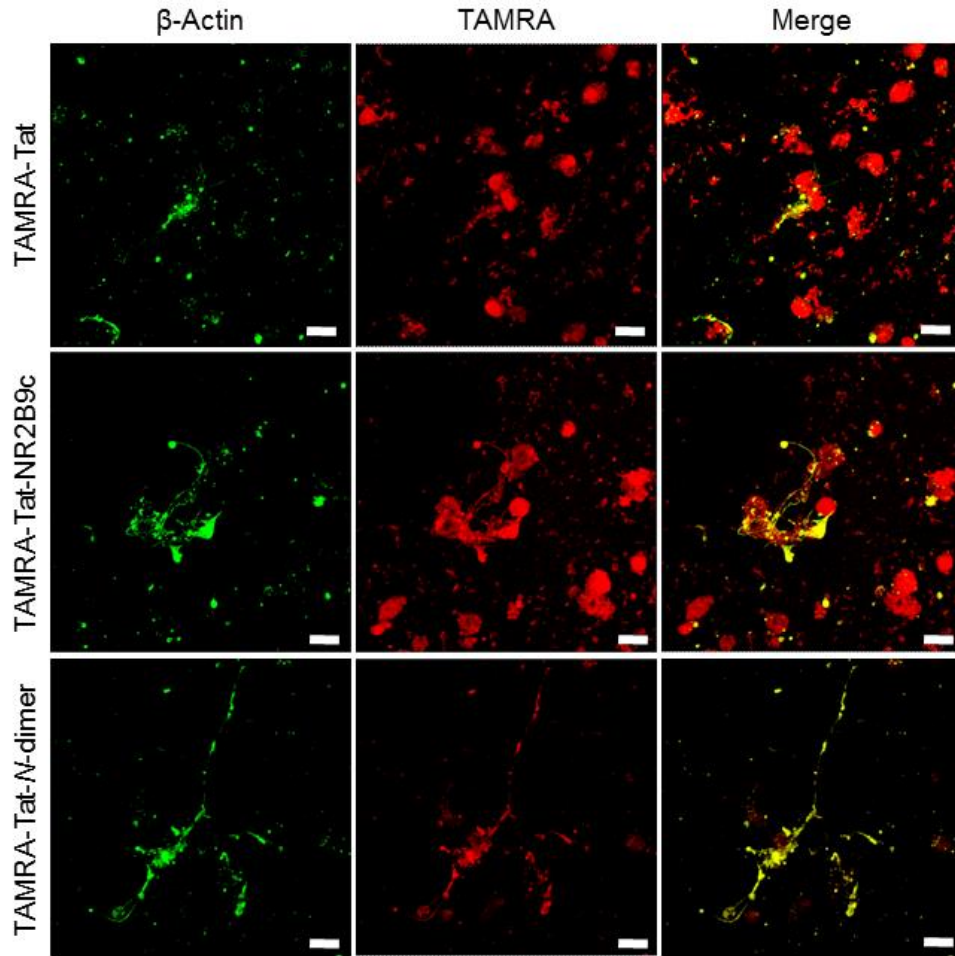

**Figure S6.** Primary mouse cortical neurons were incubated with 1  $\mu$ M TAMRA-Tat, TAMRA-Tat-NR2B9c, or TAMRA-Tat-N-dimer for 1 h at 37  $^{\circ}$ C. Following cell fixation, peptide uptake was inspected by confocal microscopy via TAMRA fluorescence with co-staining of  $\beta$ -actin. Single xy section, scale bar: 10  $\mu$ m.

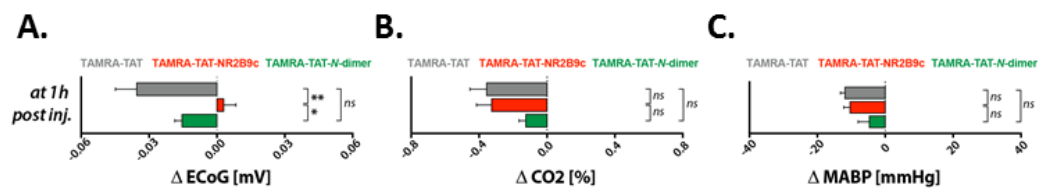

**Figure S7.** Physiological parameters after 1 h peptide circulation during two-photon imaging of peptide blood-brain barrier permeation in live mice: (A) Electrocardiographic activity (ECoG), (B) exhaled CO<sub>2</sub>, and (C) mean arterial blood pressure (MABP). Data are presented as mean  $\pm$  SEM (N = 5). Levels of significance are \*  $p < 0.05$ ; \*\*  $p < 0.01$  (two-tailed unpaired  $t$ -test).
